# Supplementary material
Source: publisher figshare collection journal article supplement (https://asha.figshare.com/articles/dataset/_/21498636)
Supplement: Supplementary file 1 [file 1]

## Sheet: Graduate
Supplemental material, Page et al., “Student Clinicians' Views of Telepractice and In-Person Service Delivery,” Perspectives, https://doi.org/10.1044/2022_PERSP-22-00054
Supplemental Material S2. Similarities and differences: final data analysis comparing telepractice to in-person service delivery.
Theme	Telepractice (codes)	Respondents for each code	Similarities	Representative Data Extract	In-person (codes)	Respondents for each code	Differences	Representative Data Extract
Preparation/Training	Didactic coursework related to clinic	5/12 (41.6%)	Both discussed coursework's relation to clinical practice.	She gave us a rundown of what therapy looks like, what to expect (Izzie).	Training received prior to therapy: previous class; Training received prior to therapy: role-playing; Training received prior to therapy: junior clinician	10/15 (66.6%)	Telepractice discusses lectures with Mrs. Wahl and In-person used information from previous classes within major.	We all have had an undergraduate class dedicated to just preparation for in-person therapy (Oakley).
	Help from previous clinician	4/12 (33.3%)	Relying on the previous clinician's documentation to assist with treatment planning. Previous clinicians also provided helpful resources.	She helped me a ton and was the best resource I could use (Nia).	Resources from other clinicians			One thing that I think is really helpful was having access to last semester's clinician, because we can see what their goals were and what progress was made (Vera).
	Training prior to therapy: No official training	4/12 (33.3%)	No official training for telepractice and reduced training with in-person.	I don't really think that we had proper training (Olive).	Prior Training None	3/15 (20%)		I didn't get any specific training (Beth).
					Resources from other clinicians	3/15 (20%)		One thing that I think is really helpful was having the SharePoint access to last semester's clinician or the previous semester, because we can see what their goals were and what progress was made (Vera).
	Resources provided before therapy	7/12 (58.3%)		We were given a list Teletherapy ideas and websites and things that other SLPs were using (Lola).	Theme: Preparing Materials - Preparing for therapy: resources used	1/15 (6.7%)	Telepractice used resources to learn how to conduct telepractice and In-person used resources to develop therapy, in general. This may be related to difficulty implementing specific treatments through telepractice.	I would try to start on ASHA, to determine the evidence-based practice (Sadie).
	Prior experience with telepractice	2/12 (16.6%)		I think, by the time that we had a client we already knew how to work zoom (Sky).			Participants who provided telepractice discussed previous experience with this mode of service delivery whereas, participants who delivered in-person services did not discuss previous experience.
	Self-education to prepare	3/12 (25%)	Some participants independently located information to prepare for therapy.	I really wasn't familiar with what he had at first, so I really had to learn about apraxia and educate myself about that (Maya).	Independent Learning; Things that would have been helpful	2/15 (13%)		It's really important to research and know what you're talking about, know the EBP you're using (Abby).
	Organizing a session	3/12 (25%)		I might organize my sessions through PowerPoints and then make a slide for each activity that we were going into. (Sky)	Theme: Preparing Materials - Preparing for therapy: resources used; accessing materials	2/15 (13%)	Telepractice discussed how they organized the session with technology; whereas, in-person focused more on organizing the session based on materials and activities.	I would try to see what was available and then go from there (Sadie).
TREATMENT PROCESS
Building Rapport	Build rapport: Initial interview	2/12 (16%)		As long as I listen and ask open-ended questions, then we were developing a good rapport with each other (Josie).			Telepractice mentioned the initial interview as a method to establish rapport.
	Building rapport: Positive experiences	6/12 (50%)	Positive experience building rapport through telepractice and in-person.	We really built good rapport with each other (Raven).	Building rapport: easy; Building rapport with client; Building rapport: easy with younger client.	11/15 (73%)		He took a long time to open up to me. But once I got him to engage with me, we had so much fun and we would joke, and we just got to have conversations and also work on therapy, at the same time, so I think it was really fun (Dena)
	Building rapport: Difficulties	3/12 (25%)	Both agreed that establishing rapport is easier through in-person service delivery due to technological barrier.	It was a little bit more difficult to establish rapport (Nia).	Pros to in-person service delivery. 5/15 33%			In-person allows for a natural conversation and on zoom I feel like it's a little more awkward; you don't want to interrupt somebody (Yvonne)
	Building rapport: Family involvement	2/12 (16%)		The parents definitely helped me a lot like and that's one way I built rapport (Maya).			In telepractice, the parents enhanced the clinician's ability to establish rapport with the client.
Determining Treatment	Client description	2/12 (16%)	Participants noted that the client's diagnosis and severity impacted treatment identification.	He was also diagnosed with ADHD (Raven).	Type of client New client	4/15 (27%)		My client has unique needs; she has a really severe visual impairment (Vera)
	Client involved in planning	2/12 (16%)	Participants requested interest from clients/family about tasks or activities for the next session.	He was involved in the planning process and that helped him stay more engaged (Tessa).	Activities used in therapy: chosen by client	9/15 (60%)		We found out what he liked, and we would bring those back, and I think that helped him become excited. (Tatum)
	Collaborative goal setting	2/12 (16%)	Participants involved the client/family in establishing goals.	They (client) know I'm here for this, and this is my goal, because they set their own goals, which I think is awesome (Izzie).	Client goals Collaborative goal setting	8/15 (53%)		When the client is involved in making the goals, which is what we did, then they'll be more motivated to meet them. (Vera)
					Multiple Goals	2/15 (13%)	Participants who conducted in-person therapy discussed the multiple targets they addressed.	There were a lot of additional components that we had to include other than speech like sensory feedback with different techniques such as giving pressure to his upper body (Sadie)
Preparing Materials	Activities tailored to client's age	1/12 (8%)	Activities chosen in telepractice and in-person therapy related to the client's age.	You can't play games with an adult because that makes it kiddy. So you don't want them to feel like they're less than the age that they are (Izzie).	Activities used in therapy: chosen by client Activities used in therapy	8/15 (53%)		We found out what he liked, and we would bring those back, and I think that helped him become excited. (Tatum)
	Activity selection Difficulties	2/12 (16%)	Selecting activities that engaged clients was more difficult through telepractice than in-person.	And I think on Telepractice that was the biggest challenge was coming up with stuff that's engaging (Lola).	Easier to access materials with in-person	3/15 (20%)		Being in-person and having access to the toys; it was just much easier. (Fiona)
	Locating materials: Positive experience	2/12 (16%)		It was easier to find things for my adult client this semester (Tessa).	Easier to access materials with in-person		Through telepractice, participants noted no difficulty locating materials; whereas, those who provided in-person services feel it is easier to access materials.
	Locating Materials: Limited/Time consuming	3/12 (25%)	Through telepractice, participants noted a limited number of materials available and locating materials required more time.	I think it was a lot more time-consuming last semester having a kid client (Tessa).	Easier to access materials with in-person
	Creating personally relevant materials	3/12 (25%)		I tried to find a lot of things that he liked and then educate myself on those things that he liked, so I could make those personally relevant materials for him. (Izzie).	Activities used in therapy: chosen by client	8/15 (53%)	In telepractice, participants created personally relevant materials. With in-person service delivery, participants used activities preferred by client but no codes reflected the amount of time or effort in creating personally relevant materials.	I also just think when I've had older clients as well, like asking them what they like to do and bringing activities that interest them and make them excited to come back each day for therapy. (Tatum)
	Common Interest	2/12 (16%)		I will just find ways to connect with him that he liked that we could talk about (Olive).			Through telepractice, participants focused on finding a common interest with the client in order to prepare materials.
	Rotating materials	1/12 (8%)	Both methods of service delivery used a variety of materials. In-person specified that multiple materials were needed to engage the client.	I just always made it a constant to try to like rotate activities (Sky).	Client engagement: Multiple materials	4/15 (27%)		He needed new materials every session, you could not repeat things or he would just lose the engagement (Sadie).
Therapy	Warm-up Conversation	2/12 (16%)	At the beginning of the session, participants conversed with clients to increase their comfort.	Each week I would ask them questions and stuff he liked at the beginning (Olive).	Building rapport: Warm up conversation with client	2/15 (13%)		We would spend the first five minutes or so with rapport and getting comfortable in the session. (vera)
	Session Structure	2/12 (16%)		We had to in our in our sessions separate reward and work (Josie).			Telepractice discussed the sequence of therapy tasks and breaks
	Activity Enjoyed/Preferred By Client	6/12 (50%)	Participants used activities preferred by clients.	I would always find articles that interest her, and that was her favorite part (Paige).	Activities used in therapy: Chosen by client			We centered activities around his interest (Zara).
	Task/Activity used in telepractice	9/12 (75%)	Participants chose tasks/activities related to therapy targets.	We did a lot of the same activities with space retrieval training, our planner, and reading an article (Paige).	Activities used in therapy	4/15 (27%)	Several participants commented on play-based therapy for in-person while telepractice involved more online resources (video games, reading online articles/stories, iPad)	He was really big into like movement games, so we always incorporated, something that we could get up and move around. (Fiona)
	Activity Selection: Adapting	2/12 (16%)		Seeing how they react to different activities; if you can take activities out, if they don't like it or they don't respond well to it (Sky).	Client engagement: Multiple materials		Telepractice demonstrated flexibility in activity selection adapting to client's response. With in-person, participants used multiple materials to enhance client engagement and participation.
	Multiple activities used at once in telepractice	1/12 (8%)		I would have Lesson Pics pulled up on the side, and we would do a draw hat and it would pull out a card for him to keep moving forward and he really liked those (Olive).	Client engagement: Multiple materials	4/15 (27%)	Telepractice used multiple materials at once; whereas, in-person used multiple materials but at separate times during a session.	He needed new materials every session, you could not repeat things or he would just lose the engagement (Sadie).
	Technology was not an issue	1/12 (8%)		What was surprising is I thought I was gonna have a bunch of technical issues, but I don't think I've had any problems with technology (Josie).			Participants felt technology wasn't an issue through telepractice. In-person did not use technology other than a laptop or tablet within an activity.
	Technology adjustments	1/12 (8%)		One thing that I didn't consider was that when I'm sharing my screen with a PowerPoint and then giving the client direct feedback, put your tongue here I'm this tiny little box in the corner and he's seeing (Lola).			Participants made adjustments to the display on zoom.
	evidence-based practice	6/12 (50%)	Participants used different EBP treatment approaches	I used a few different evidence-based practice this semester, the speech modification strategy, easy onset, stuttering modification strategies, and cancellation and slide out (Raven).	Evidence-based practice Skilled therapy Approach to therapy	9/15 (60%)		Pivotal response treatment so just a play-based treatment, and that seemed to work best for him. (Fiona)
	Clinician prompts and cues	4/12 (33%)	Telepractice mentioned the cues/prompts they provided within therapy and through in-person service delivery, participants mentioned the different strategies they implemented.	You have to keep prompting and asking to attempt it (Sky).	fluency targets	2/15 (13%)		We worked on pacing with reading. (Yvonne)
	Telepractice limited clinician cues	3/12 (25%)	Participants felt that telepractice limited the cues and prompts for certain treatments.	I really wanted to be right beside her to show her where you find that word (Nia).	Pros to in-person service delivery	4/15 (27%)		We could implement a play-based interaction between me and the client and also modeling for the parent. I think if it was online that would have been really difficult to implement (Zara).
	Clinician prompts and cues: Encouragement	1/12 (8%)		I just think that he needs that excitement to feel like he's doing well (Izzie).			With telepractice, participants provided words of encouragement during therapy to increase the client's motivation.
	Clinician prompts and cues: Keeping client alert	2/12 (16%)		That's when like we would stand up and take a stretch break (Lola).			With telepractice, clients required more cues to remain alert.
	Mirrored behavior	1/12 (8%)	In telepractice and in-person, participants noted how their behavior influenced their client's excitement and participation.	I figured out that if I really showed excitement for him and started kind of be like good, he would get really excited and that would re engage him (Izzie).	Mirrored behavior	1/15 (7%)		We also noticed the client would bounce off of our engagement, so obviously we were more interactive. (Sadie)
	Reward system	2/12 (16%)	Participants used incentives to increase client's participation and success.	The token chart was a big thing every time he cooperated, I would go show him the screen and slide tokens (Quinn).	Materials used as reinforcement	2/15 (13%)		She was pronouncing it wrong, but she didn't want to correct yourself on the first try so by implementing that token economy and saying okay, you get a sticker if you do it right, the very first time, if you get so many stickers, you will get a prize (Oakley)
	Adult vs. Child treatment	2/12 (16%)		Adult therapy is very different than child therapy (Kim).			Participants noted how service delivery is different for children and adults and that telepractice is easier with adults.
Support	Support from professor	2/12 (16%)		If we had a question, you guys were always available to help us (Kim).	Resources from other clinicians	3/15 (20%)	With telepractice, participants relied on resources and support from supervisors while participants who delivered in-person services relied on previous training and other clinicians.	One thing that I think is really helpful was having the SharePoint access to last semester's clinician or the previous semester, because we can see what their goals were and what progress was made. (Vera)
	Support from supervisor	5/12 (42%)	During therapy, participants received support from supervisors in relation to therapy recommendations and feedback.	I like that my supervisor was right there on the therapy session (Raven).	Feedback from supervisor Worked with senior clinician	6/15 (40%)		My supervisor came in and demonstrated exactly how to do it. She gave us brief overviews on it (Sadie)
	Support from supervisor: Limited support	1/12 (8%)		I felt like I had less support from my supervisor (Lola).	Feedback from supervisor Worked with senior clinician	6/15 (40%)	One participant from telepractice felt she received limited support from her supervisor. With in-person service delivery, participants received feedback from the supervisor and also worked with a senior clinician.	It was really helpful to have two of us to double check and make sure we were agreeing on the data. (Sadie)
Client Engagement	Client engagement	3/12 (25%)	Most clients were engaged in therapy.	My client stayed engaged throughout the sessions pretty well (Raven).	Client engagement	4/15 (27%)		He was very engaged and I could tell he was listening (Ella).
	Client behavior: Positive	2/12 (16%)		He was really well-behaved (Raven).	Client behavior	5/15 (33%)	Telepractice noted instances in which clients demonstrated good behavior. Participants who delivered therapy in-person noted that behaviors interrupted the flow of therapy.	Refuse to do what we asked him to do; trying to run out or hide under the table. (Penelope)
	Client-clinician relationship	3/12 (25%)	Participants felt it was easy and important to establish a relationship with clients.	We had a good time; just that bond (Paige).	Building rapport: Easy with young clients	3/15 (20%)		I had a younger client. It was really important that I let him take the lead and feel in control of the session so that it was more of a friendship relationship, rather than me being a dictator (Willow)
	Benefits of telepractice: Increased client comfort	3/12 (25%)		I think it was better being in her own home (Nia).			Through telepractice, clients were comfortable in their home
	Client loved telepractice	2/12 (16%)		She loved tele practice (Nia).	Client prefers in-person	3/15 (20%)	Some clients loved telepractice while other preferred in-person service delivery.	She told me that if we hadn't gone back to in-person this semester, she wouldn't have been able to do it. (Vera)
	Client controlling the screen: Benefits	1/12 (8%)	Participants gave clients control of session to increase engagement.	Having them control the screen, I think, brought a lot more engagement because they were a lot more engaged in the activity (Sky).	Activities used in therapy: Chosen by client	8/15 (53%)		She would not play a board game or anything like that. She wanted to play pretend, so we would play pretend Legos and Playdough for hours and hours and hours, and it was nice. (Oakley)
	Client comfortability: Difficulties	2/12 (16%)		There were times, he would slump down (Quinn).			Through telepractice, the client became comfortable physically which interfered with client's performance.
	Client Fatigue	4/12 (33)		He was very fatigued most of the time (Izzie)			Some clients demonstrated fatigue due to timing of therapy via telepractice (early or after school).
	Client not interested in therapy	2/12 (16%)	Some clients were not interested in therapy which may have been expressed through behavioral responses.	There were times he would leave the computer (Quinn).	Client behavior	5/15 (33%)		Didn't really want to interact (Sadie).
	Difficulties of telepractice: Client behavior	2/12 (16%)	Client behaviors were noted in both telepractice and in-person service delivery.	Mom had to bear hug him down to even focus (Maya).	Client behavior	5/15 (33%)		Some of his behaviors kind of affected his ability to meet those goals,. He would just like stop and say no. (Fiona)
	Distractions: Environment	2/12 (16%)	Telepractice presented several environmental distractions.	There's so much background noise (Quinn).	Pros to in-person service delivery: reduced distractions	1/15 (7%)		It's just such a better environment for therapy and there's no distractions. (Fiona)
	Distractions: Technology	2/12 (16%)	Technology access/connectivity as well as limitations for individuals with visual impairments created treatment obstacles.	It was a fight to get the mouse control back (Lola).	Cons to telepractice due to technology barrier	8/15 (53%)		Probably impossible for having a naturalistic environment so that would have been a huge con with the Telepractice (Zara)
	Distractions: Animals	2/12 (16%)	Participants noted that clients had pets which both interfered with therapy but also added to the conversation.	She had a few distractions with her cats, but it never impacted her skills (Paige).	Pros to in-person service delivery: reduced distractions	1/15 (7%)		It's just such a better environment for therapy and there's no distractions. (Fiona)
	Environmental distractions by clinician	1/12 (8%)		There's a cat laying on my box back here (Olive).			Participants became distracted by pets/children as well.
					Managing client behavior	5/15 (33%)	Through in-person, participants mentioned strategies to manage behavior; through in-person, participants described the behaviors without a solution.	We changed the environment, we would bring him mats to sit on and always redirect so we never drew attention to his behaviors. (Sadie)
Family/Caregiver Involvement	Parent/Caregiver involvement	7/12 (58%)	Family/caregiver were involved in therapy to ensure client engagement and understanding.	My client's mom was very involved (Sky).	Parent involvement; Parent sat in session Communication between parent and client	9/15 (60%)		He is probably the most involved parent I've ever seen, and I'm so grateful for that because that directly impacts how well she does and how fast she improves. (Oakley)
	Parent involvement: Generalization	1/12 (8%)	Educating parents about applying therapy at home and communicating with parents about any issues at home.	a good way to implement what I was doing and seeing how the mom could generalize that in her own (Sky).	Parent education Parent education: Generalization activities	5/15 (33%)		He was willing to implement things that we had done in the session at home as well (Sadie).
	Parent involvement: Impacting protocol	2/12 (16%)	Parents interjected cues outside of treatment protocol or answered questions for client.	I feel like relying on your parent or something like that kind of really interfered with him learning (Maya).	Parent interfered with therapy	1/15 (7%)		Whichever parent was there, sitting inside the room with us, they would jump in and answer the question for him. (Ruth)
	Parent involvement: Limited involvement	3/12 (25%)	Some parents showed limited involvement in the session.	my client's family wasn't very involved at all during the first session (Raven).	Parent involvement: Limited	3/15 (20%)		Mom and dad owned a company, and they are very busy all the time. We ended up not doing four sessions. (Ella)
Data Collection	Data collection	3/12 (25%)	Collected both binary and narrative forms of data. Participants noted differences between adult and child data collection.	It was a little bit different data collection, for some of it, I would write down what she would say (Paige).	Collecting data	8/15 (53%)		It was binary system, which was good enough for articulation. (Beth)
	Data Collection: Positives	3/12 (25%)	Both agree that collecting data through telepractice was easy and allowed clinicians to conceal data.	Data collection was easy (Raven).	Cons to in-person services: collecting data	3/15 (20%)		You can really conceal taking data a lot better with telepractice and I'm sure it's the same way with adults, because adults can obviously see if you're marking a plus or a minus. (Willow)
	Data Collection: Difficulties	3/12 (25%)	Reduced experience collecting some forms of data and looking down to take data presented difficulties. Balancing therapy with data collection was difficult as well.	I feel bad for like looking down writing (Paige).	Collecting data: difficulties Collecting data while doing therapy			it was kind of hard because picture change data is very different, like I didn't really have any experience (Sadie).
Client Progress	Client absences	1/12 (8%)	Clients were absent for a few sessions during the semester which impacted their progress.	He had had so many surgeries last semester and missed a lot of sessions (Izzie).	Client absence	1/15 (7%)		We ended up not doing four sessions (Ella).
	Limited sessions	1/12 (8%)	One participant commented on client only attending once a week.	He was only once a week and so by the beginning of each week he needed a reminder of exactly what we were doing (Olive).
	evidence-based practice: Effective	4/12 (33%)	Participants felt the evidence-based treatment was effective.	It worked well (Sky).	evidence-based treatment	8/15 (53%)		Pivotal response treatment so just a play-based treatment, and that seemed to work best for him. (Fiona)
	Generalization of treatment	2/12 (16%)		That was awesome seeing him actually using his strategies that we practiced in speech outside and then being excited to tell me about it (Raven).	Generalization activities	4/15 (27%)	Telepractice assessed generalization of therapy targets during sessions or clients reported use of strategies; In-person provided generalization strategies and parents reported on use at home.	The parent being able to do therapy at home really helped his progress. (Zara)
	Positive Telepractice Experience: Client Making Progress	5/12 (42%)	Clients made progress with the established therapy goals.	My client made a lot of progress (Raven).	Client Progress	8/15 (53%)		My client met all of his goals. We even extra goals, because we had extra time so I was really proud of him. (Beth)
	Adult clients benefit from telepractice	1/12 (6%)		I think that Tele therapy is more beneficial for an adult (Izzie).			Participants who administered therapy through telepractice believe that adult clients benefit from telepractice.
	Building client confidence	1/12 (6%)		I definitely saw his confidence just soar as a semester went on (Raven).			Through telepractice, client's confidence increased.
Clinician Reaction to Treatment	Initial fears						Telepractice: participants were nervous initially In-person did not include any comments about nervousness which may be related to junior clinician experience. There were some uncertainties with having a new client or an adult client for the first time but no initial fears for providing therapy in general through in-person.
	Clinician anxiety in-person	3/12 (25%)	Participants who conducted therapy through telepractice reflected on their previous experience delivering therapy in-person. They were anxious about others watching them delivery therapy. Participants who delivered in-person therapy commented how the nervousness associated with parents sitting in the therapy room.	I had major anxiety in the clinic; I did not like that little tiny room, plain walls, nothing in there (Quinn).	Parents sat in session	2/15 (13%)		Dad sat in on every single session. He sat right outside the door; he didn't want to sit behind the observation glass. (Ruth)
	Clinician comfort	1/12 (6%)	Participants felt comfortable delivering therapy.	I felt really comfortable and was able to be goofy since they were so young (Maya).	Clinician thoughts/feelings: positive	4/15 (27%)		It made me feel good in the end, once I started to get a grip on it. (Zara)
	Clinician engagement	4/12 (33%)	Participants were engaged throughout sessions.	I was definitely engaged (Sky).	Clinician engagement Clinician engagement increased with in-person	5/15 (20%)		Just be engaged, because the more excited and engaged I was, the more excited he was (Penelope).
	Positive telepractice experience: Clinician	7/12 (58%)	Participants enjoyed delivering therapy through telepractice and in-person.	I think everything went well through telepractice (Tessa).
	Clinician control over session	3/12 (25%)		He didn't like anything I did, but I made him do it anyway (Quinn).	Building rapport with younger client	3/15 (20%)	Through telepractice participants mentioned difficulty controlling the session; whereas, through in-person service delivery, clients lead the session.	I had a younger client. It was really important that I let him take the lead and feel in control of the session so that it was more of a friendship relationship, rather than me being a dictator (Willow).
	Clinician Confidence	1/12 (8%)	In the end, participants felt 'good' and 'confident' about the therapy they provided whether in-person or telepractice.	I feel really confident providing telepractice speech therapy now (Raven).	Clinician thoughts/feelings: positive	4/15 (27%)		It made me feel good in the end, once I started to get a grip on it. (Zara)
	Telepractice wasn't difficult	4/12 (33%)	For some participants, administering speech-language therapy through telepractice wasn't difficult.	Surprising factor of it being not super difficult (Nia).
	Awareness of non-verbal expression	1/12 (8%)		I got used to laying my hand on my face or just being aware of my own body language (Sky).			Through telepractice, participants were more aware of non-verbal expression due to reflection.
	Clinician perspective: 2 clinician sessions	1/12 (8%)	Positive and negative perceptions of having another student clinician in relation to the accuracy of data collection but the ability to 'play' with the client while the other clinician collected data.	I think, having two clinicians probably made for some inconsistency with data and also just having two different personalities (Tessa).	Worked with senior clinician	6/15 (40%)		I had a co-clinician to so we would work together on behavior interventions and looking at ASHA, to see what types of things we could do. (Fiona)
	Clinician Perspective: Things the Clinician would have done differently	5/12 (42%)	Self-reflections included areas for improvement in data collection and implementing therapy.	I really think just continuing to implement these games (Izzie).	evidence-based practice: clinician experience Clinician learned from therapy Learning from mistakes	3/15 (20%)	Through in-person, participants shared their growth in becoming a skilled clinician and learning from mistakes.	The first session I implemented this approach, I did it wrong and it took time to realize (Abby).
Barriers to Telepractice Service Delivery	Difficulties of telepractice: Client's technology	2/12 (16%)	Through telepractice, clients experienced poor internet connection or access to technology.	There were a couple sessions where his Internet was so bad (Quinn).	Cons to telepractice due to technology barrier	8/15 (53%)		Mom last semester had a lot of issues with technology, so it was a little bit harder to talk with her (Ella).
	Difficulties of telepractice: Clinician's technology	1/12 (8%)		I had to start going to my sister's house (for internet) (Paige).			Some participants had limited access to internet as well.
	Reduced body language	1/12 (8%)		I think Telepractice is very different than in-person, because you don't have the body language. You're sitting in front of a computer just staring you don't have the personal aspect to it (Kim).			Telepractice limits interpretation of body language.
	Reduced work	1/12 (8%)		When they're just playing the game, I felt like oh we're not doing enough work (Josie).			Telepractice felt like they were not obtaining enough data or productions, essentially working because they switched between therapy and breaks.
	Difficulties of telepractice: Data collection	2/12 (16%)	Through both in-person and telepractice, participants mentioned data collection difficulties related to the client's age and type of data collection.	I think doing it in-person, I have an easier time taking data than teletherapy (Tessa).	Collecting data: Difficulties	5/15 (33%)		Going from a child client to an adult client, the data is completely different (Abby).
	Difficulty with AAC	2/12 (16%)		My client used the proloquo2go APP and no clue how to do that, how to share my screen or anything (Nia).	Difficulties with therapy	3/15 (20%)	Telepractice noted difficulties with certain targets or treatments (AAC, speech sound production); whereas, in-person noted more difficulty with certain targets or treatments due to reduced experience.	That was really hard just because I haven't really had experience with that (Sadie).
	Difficulty hearing	2/12 (16%)	While telepractice reduced the clinician's ability to see and hear the client's productions; the mask worn in-person served as a physical barrier as well.	It's a hard to hear him plus English was second language (Quinn).	Cons to in-person services: physical barriers (face mask) Cons to telepractice: difficulty understanding client (speech sound production)	3/15 (20%)		Especially for articulation, it's much easier in-person, than with computer audio and all of that (Cleo).
	Difficulty seeing	4/12 (33%)	While telepractice reduced the clinician's ability to see and hear the client's productions; the mask worn in-person served as a physical barrier as well.	I had a hard time seeing where he was putting his tongue; I could tell he was placing it wrong (Quinn).	Cons to telepractice: difficulty understanding client (speech sound production)	2/15 (13%)		My client wore a mask the whole time and he didn't like wearing the shield. So where he has articulation difficulty, it's hard to see his mouth to see if he's producing correctly (Penelope).
	Prefer In-person vs Telepractice	2/12 (16%)	In-person is preferred for specific clients (typically younger) and to address certain deficits (pragmatic skills)	I feel like in-person would have been more conducive to that then teletherapy was (Lola).
	Telepractice depends on target	3/12 (25%)	Effectiveness of telepractice depends on the treatment target. Treating speech sound disorders was noted as an obstacle through telepractice.	it depends on which phoneme you get just last semester it was a lot easier (Quinn).	Cons to telepractice: difficulty understanding client (speech sound production)	2/15 (13%)		For articulation it's much easier in-person, with computer audio (Cleo).
Benefits of Telepractice	Clinician Perspective: No difference between in-person and telepractice	1/12 (8%)		I don't think it would have been any different in-person, than in telepractice (Kim).			One participant believed that telepractice and in-person service delivery were similar.
	Benefits of Telepractice: Reduces travel for clients	2/12 (16%)	A benefit of telepractice includes the reduced travel required to attend therapy in-person.	She wouldn't have been there to actually bring him to campus; that that's a big pro for Telepractice, it just gives more people an opportunity (Raven).	Telepractice benefit with travel	1/15 (7%)		Kids got stuck in traffic, so we did session through his phone in the car and which had some challenges, but at least he was getting therapy. If in-person, he wouldn't get therapy. (Zara)
	Benefits of Telepractice: Technology	2/12 (16%)		I thought the screen sharing was beneficial for him because we could look up those videos and watch them together (Izzie).			Through telepractice, use of screen sharing with personal photos and annotate benefited the client.
	Benefits of telepractice: Clinician comfort	3/12 (25%)	Participants felt comfortable in their home and had fun during therapy.	I feel more comfortable in my home (Raven).	Clinician thoughts/feelings: positive	4/15 (27%)		It felt really fun and engaging for us as well. (Tatum)
	Benefits of telepractice: Accessible for clinician	3/12 (25%)		It's good for me because I'm a mom and work from home. So it helps because I don't want to quit my job and drive to campus (Quinn).			Through telepractice, participants better managed the balance between home and school responsibilities.
